# Supplementary material for: A Janus MoSSe monolayer: a superior and strain-sensitive gas sensing material
Source: Royal Society of Chemistry journal article supplement (doi:10.1039/c8ta08407f), 2018-12-03
Supplement: c8ta08407f1.pdf [file c8ta08407f1.pdf]

## Supporting Information

### Janus MoSSe monolayer: superior and strain-sensitive gas sensing material

Cui Jin<sup>1,2</sup>, Xiao Tang<sup>2</sup>, Xin Tan<sup>3</sup>, Sean C. Smith<sup>3</sup>, Ying Dai<sup>1\*</sup>, Liangzhi Kou<sup>2\*</sup>

<sup>1</sup>*School of Physics, State Key Laboratory of Crystal Materials, Shandong University, Jinan 250100, China*

<sup>2</sup>*School of Chemistry, Physics and Mechanical Engineering Faculty, Queensland University of Technology, Gardens Point Campus, QLD 4001, Brisbane, Australia*

<sup>3</sup>*Department of Applied Mathematics, Research School of Physics and Engineering, Australian National University, Canberra 2601, Australia*

[daiy60@sina.com](mailto:daiy60@sina.com)

[Liangzhi.kou@qut.edu.au](mailto:Liangzhi.kou@qut.edu.au)

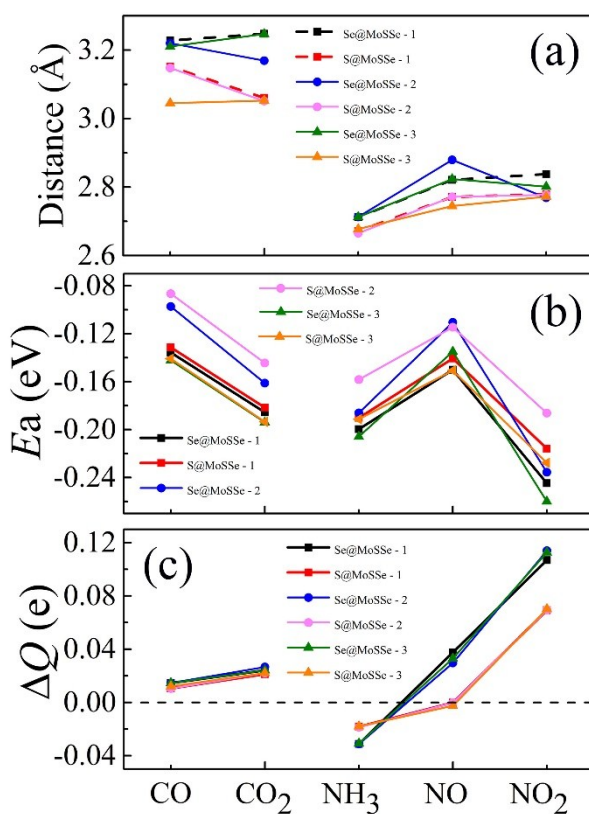

**Fig. S1** The value of (a) adsorption distance  $d$  (Å), (b) adsorption energy  $E_a$  (eV), and (c) charge transfer  $\Delta Q$  (e) of gas molecules CO, CO<sub>2</sub>, NH<sub>3</sub>, NO and NO<sub>2</sub> adsorption on Se-layer, S-layer, respectively with different vdW correction methods (Method 1: the

zero damping DFT-D3 method of Grimme, which we adopt in this paper; Method 2: the DFT-D2 method of Grimme; Method 3: the DFT-D3 method with Becke-Jonson damping). The positive (negative) value of charge transfer represents gaining (losing) charge of the adsorbed gas molecule from (to) the layer.

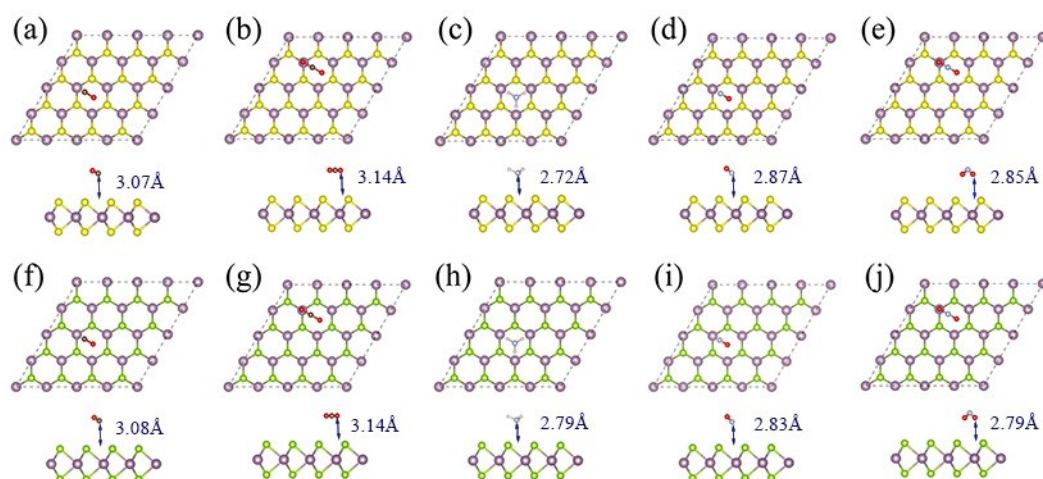

**Fig. S2** Structural models and optimized structures of gas molecules CO, CO<sub>2</sub>, NH<sub>3</sub>, NO and NO<sub>2</sub> adsorption on the MoS<sub>2</sub> (a-e) and MoSe<sub>2</sub> (f-j). The atoms of monolayer and adsorbed molecules are denoted. The 4×4 super cell of MoS<sub>2</sub> (MoSe<sub>2</sub>) monolayer is represented by the dashed lines. Purple, green and yellow balls are Mo, Se and S atoms respectively. Black, red, light grey and light pink represent C, O, N and H atoms respectively.

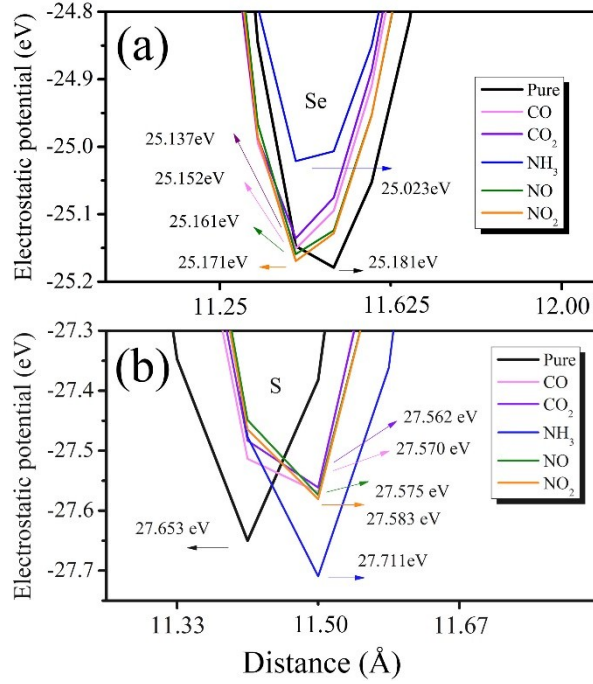

**Fig. S3** The variation of electrostatic potential  $\Phi$  (eV) of (a) Se surface, and (b) S surface of the gas molecule CO, CO<sub>2</sub>, NH<sub>3</sub>, NO and NO<sub>2</sub> adsorption on Se-layer (S-layer), in comparison to pure Janus MoSeS structure. The corresponding electrostatic potential values are denoted with the different colors.

**Tab. S1** Calculated the electrostatic potential shifting values  $\Delta\Phi$  (eV) of Se (S) surface of the gas molecule CO, CO<sub>2</sub>, NH<sub>3</sub>, NO and NO<sub>2</sub> adsorption on Se-layer (S-layer), in comparison to pure Janus MoSeS structure. The positive (negative) value of  $\Delta\Phi$  represents up-shifting (down-shifting) of the gas molecule adsorbed surface.

| $\Delta\Phi$ (eV) | CO   | CO <sub>2</sub> | NH <sub>3</sub> | NO   | NO <sub>2</sub> |
|-------------------|------|-----------------|-----------------|------|-----------------|
| Se-layer          | 0.03 | 0.04            | 0.16            | 0.02 | 0.01            |
| S-layer           | 0.08 | 0.09            | -0.06           | 0.08 | 0.07            |

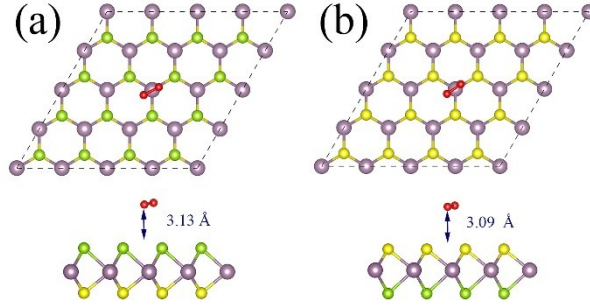

**Fig. S4** Structural models and optimized structures of gas molecule  $O_2$  adsorption on the (a) Se-layer, and (b) S-layer. The atoms of monolayer and adsorbed molecules are denoted. The  $4 \times 4$  super cell of Janus MoSSe monolayer is represented by the dashed lines. Purple, green, yellow and red balls are Mo, Se, S and O atoms respectively.

**Tab. S2** Calculated adsorption distance  $d$  (Å), adsorption energy  $E_a$  (eV), and charge transfer  $\Delta Q$  (e) of gas molecule  $O_2$  adsorption on Se-layer, S-layer, respectively. The positive value of charge transfer represents gaining charge of the adsorbed gas molecule from the layer.

| Adsorption surface | $d$ (Å) | $E_a$ (eV) | $\Delta Q$ (e) |
|--------------------|---------|------------|----------------|
| Se-layer           | 3.13    | -0.104     | 0.035          |
| S-layer            | 3.09    | -0.101     | 0.018          |

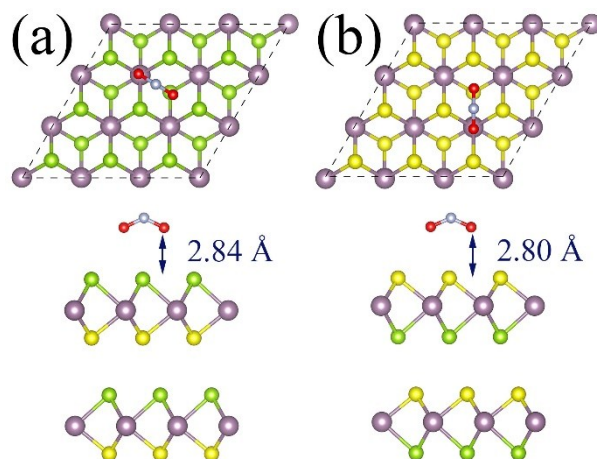

**Fig. S5** Structural models and optimized structures of gas molecule  $\text{NO}_2$  adsorption on the (a) Se-bi-layer, and (b) S-bi-layer. The atoms of monolayer and adsorbed molecules are denoted. The  $3 \times 3$  super cell of Janus MoSSe monolayer is represented by the dashed lines. Purple, green, yellow, light grey and red balls are Mo, Se, S, N and O atoms respectively.

**Tab. S3** Calculated adsorption distance  $d$  ( $\text{\AA}$ ), adsorption energy  $E_a$  (eV), and charge transfer  $\Delta Q$  (e) of gas molecule  $\text{NO}_2$  adsorption on Se-layer, Se-bi-layer, S-layer, and S-bi-layer, respectively. The positive value of charge transfer represents gaining charge of the adsorbed gas molecule from the layer.

| Adsorption surface | $d$ ( $\text{\AA}$ ) | $E_a$ (eV) | $\Delta Q$ (e) |
|--------------------|----------------------|------------|----------------|
| Se-layer           | 2.84                 | -0.245     | 0.107          |
| Se-bi-layer        | 2.84                 | -0.312     | 0.186          |
| S-layer            | 2.78                 | -0.216     | 0.069          |
| S-bi-layer         | 2.80                 | -0.222     | 0.072          |

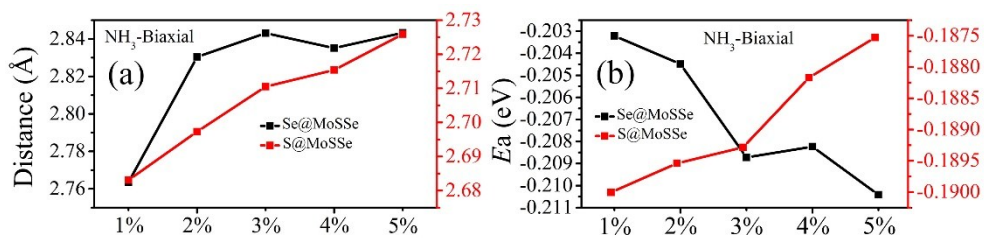

**Fig. S6** The variation of (a) adsorption distance  $d$  (Å), and (b) adsorption energy  $E_a$  (eV) of the gas molecule  $\text{NH}_3$  adsorption on Se-layer and S-layer, respectively, as the function of applied biaxial tensile strain.

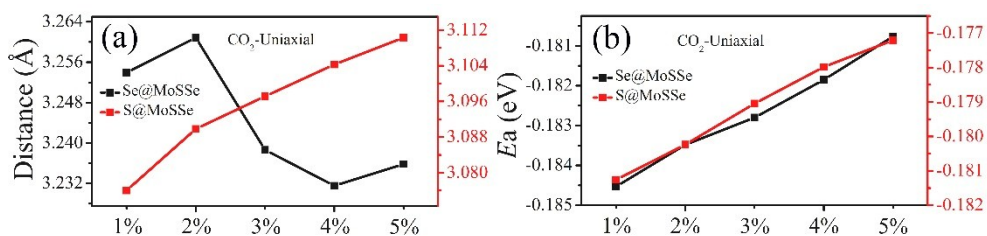

**Fig. S7** The variation of (a) adsorption distance  $d$  (Å), and (b) adsorption energy  $E_a$  (eV) of the gas molecule  $\text{CO}_2$  adsorption on Se-layer and S-layer, respectively, as the function of applied uniaxial tensile strain.
